# Supplementary material
Source: PubMed Central journal article supplement (PMC2795539)
Supplement: 0906361106_0906361106SI.pdf [file 0906361106_0906361106SI.pdf]

# Supporting Information

Keller et al. 10.1073/pnas.0906361106

## SI Text

**Animals.** Male C57BL/6 mice were obtained from Bundesinstitut für Risikobewertung, and male C57BL/6 adrenalectomized mice were purchased from Charles River Laboratories ([www.criver.com/SiteCollectionDocuments/rm\\_ss\\_r\\_adrenalectomy.pdf](http://www.criver.com/SiteCollectionDocuments/rm_ss_r_adrenalectomy.pdf)). PER2::LUC mice on a C57BL/6 background were kindly provided by J. S. Takahashi (1). *Per1::luc* rats (kind gift of Hajime Tei) (2) were raised and housed at Hilltop Animal Facility of Washington University (St. Louis, MO).

Animals were maintained individually in cages with continuous access to food, water and a running wheel. All procedures were in accordance with institutional guidelines and the requirement of the state authority for animal research conduct. Mice and rats were housed in a 12-h light/12-h dark (LD) cycle for at least 2 weeks before transfer to constant darkness (DD).

**Quantitative RT-PCR.** Spleen and inguinal lymph nodes of 8- to 10-week-old male C57BL/6 mice were harvested in 3- or 6-h intervals over the course of the first 2 days in DD to exclude direct effects of light on gene expression. Total RNA was isolated with RiboPure (Ambion), from spleen or with RNeasy kit (Qiagen), from lymph nodes, and then reverse transcribed to cDNA by using SuperScript II (Invitrogen) and random hexamer primers (MWG). Spleen and lymph nodes: *Per2* and *Rev-Erba* transcript levels were determined by using TaqMan quantitative PCR. Primers and 5'-FAM-3'-TAMRA-labeled probes were designed according to the guidelines of the Primer Express 2.0 software (Applied Biosystems). Primer and probe sequences: *Gapdh*: forward TGTGTCGGTCGTGGATCTGA, reverse CCTGCTTACCACCTTCTTGA, probe CCGCCTGGAGAAACCTGCCAAGTATG, *Rev-Erba*: forward AGGTGGTAGAGTTTGCCAAACAC, reverse CACCATCAGCACCTCAAAGGT, probe TCCGTGACCTTCTCAGCACGACCA, *Per2*: forward ATGCTCGCCATCCACAAGA, reverse GCGGAATCGAATGGGAGAAT, probe ATCCTACAGGCCGGTGGACAGCC. Validation of gene chip expression profiles from peritoneal macrophages (Figs. 4 and 5): total RNA was prepared by using the RNeasy Mini kit (Qiagen) and reverse transcribed to cDNA with Reverse Transcriptase (Fermentas). Quantitative PCRs were performed in triplicate with SYBR green fluorescence assays using mouse QuantiTect Primer assays (Qiagen) and analyzed with ABI Prism 7000 Sequence Detection System (Applied Biosystems). The transcript levels for clock genes were normalized to *Gapdh* mRNA according to the  $2^{-\Delta\Delta Ct}$  method (3) and additionally to mean expression levels (Figs. 4 and 5) or to minimum expression (Fig. 1).

**Real-Time Bioluminescence Monitoring.** Spleen and lymph node: Male PER2::LUC mice (1) and a *Per1::luc* rat (2) were entrained to a LD cycle. At the age of 2 months, mice were killed 2 hours before the end of the light period. A small piece of spleen and two superficial inguinal lymph nodes were cultured individually on Millicell membranes (Millipore) with 1 mL of DMEM (Sigma) supplemented with 0.1 mM beetle luciferin (Promega) as previously described (4). Macrophages were harvested by peritoneal lavage with sterile, ice-cold PBS (PBS, 3–4 mL). Cells were collected by centrifugation ( $300 \times g$ , 10 min, RT), and the pellet was resuspended in DMEM supplemented with 10% serum and 0.1 mM luciferin (Promega). Cells were cultured in Petri dishes and finally covered with lids, sealed with grease, and placed in light-tight boxes using a single photomultiplier tube

(Hamamatsu Photonics) at 36.5 °C in the dark. Bioluminescence was recorded in 1-min bins for at least 6 days.

**FACS Analysis.** Spleen cells (i.e., splenocytes—mononuclear white blood cells extracted from splenic tissue) were derived as follows: Spleens from C57BL/6 mice were harvested, cut into pieces, and passed through a cell strainer (BD Biosciences). Red blood cell lysis was performed with distilled water. Splenic B cells, T cells, and macrophages were labeled with anti-mouse CD11b, anti-mouse CD14, anti-mouse CD19, and anti-mouse CD90.2 (BD Biosciences) on ice. Cells were washed twice with ice-cold FACS buffer (PBS, 1% FCS, 0.05% sodium azide), fixed with 1% paraformaldehyde in PBS and subsequently analyzed on FACSscan flow cytometer (Becton Dickinson) using CellQuest software.

Sort control: MACS-sorted CD11b<sup>+</sup> peritoneal cells were labeled with anti-mouse CD11b (Miltenyi Biotec), anti-mouse CD19 (BD Biosciences), and anti-mouse CD14 (eBiosciences) antibodies according to manufacturer instructions and consecutively analyzed with a FACS canto II (BD). Samples with <90% CD11b-positive cells were excluded from further processing.

**Cell Sorting.** Peritoneal cells from C57BL/6 or PER2::LUC mice were collected by lavage of the peritoneal cavity with 2 mL of ice-cold PBS. Macrophages were isolated based on the expression of the CD11b surface marker by using anti-mouse CD11b microbeads (Miltenyi Biotec) and a magnetic separation system (autoMACS; Miltenyi Biotec). A small fraction of positive CD11b sorted cells were purity analyzed by FACS (see above).

**LPS Stimulation and ELISA. Ex vivo LPS stimulation experiment.** Spleens of 8- to 10-week-old male C57BL/6 mice were harvested at regular 4-h intervals on the first day in DD and processed to a single-cell suspension. The cells were cultured in RPMI medium 1640 containing 10% FCS and immediately treated with 5  $\mu\text{g}/\text{mL}$  of a highly pure lipopolysaccharide preparation (LPS, Alexis, from *E. coli* serotype R515) for 4 h. Cell-free supernatants were harvested, frozen at  $-20\text{ }^\circ\text{C}$ , and analyzed at the end of the time-series.

**In vitro LPS stimulation experiment.** Primary splenic and peritoneal macrophages were collected, resuspended in endotoxin-free media (RPMI medium 1640, 10% FBS) and cultured at 37 °C, 5% CO<sub>2</sub>. Twenty-four hours after seeding, cells were treated with LPS (3  $\mu\text{g}/\text{mL}$ ) for 4 h. TNF- $\alpha$  and IL-6 contents in the supernatant were analyzed by ELISA according to the manufacturer's recommendations. TNF- $\alpha$  ELISA was purchased from Biosource and IL-6 ELISA from eBioscience.

**Transcriptional Profiling (Microarray Analysis).** C57BL/6 mice were entrained to a LD cycle and then transferred to DD. The first day in DD, peritoneal macrophages from four mice per time point were collected and magnetically sorted (see *Cell Sorting* for details) every 4 h. Total RNA was isolated by using RNeasy Mini kit (Qiagen). Integrity and amount of total RNA was analyzed by using an Agilent 2100 Bioanalyzer (Agilent). RNA of three mice per sampling time was pooled in equal amounts (48 ng/ $\mu\text{L}$ ). Synthesis of cDNA, amplification, labeling, and hybridization were performed by the Labor für Funktionelle Genomforschung (LFGC, Charité, Berlin), by using GeneChip Mouse Gene 1.0 ST arrays (Affymetrix). Data acquisition and primary analysis—acquisition and quantification of array images as well as primary data analysis were performed by using the Affymetrix software

packages: Microarray Suite version 5.0 and Data Mining Tool version 2.0. Circadian expressed genes were identified by using the CircWaveBatch v3.3 software (R. A. Hut) (5) with a cutoff  $P$  value of 0.05 and period length restricted to 24 h.

**Statistical Analysis.** Time-series data on cytokine secretions were analyzed with CircWave v1.4 software (R. A. Hut) (5) by using a linear harmonic regression fit with an assumed period of 24 h (www.rug.nl/biologie/onderzoek/onderzoekgroepen/chronobiologie).

**Local False-Discovery Rate (lfdr).** The lfdr estimates the fraction of false-positive tested datasets at a given  $P$  value from a larger set of data. To that end,  $P$  values of genes with a average expression value of  $\geq 50$  from the microarray analysis were analyzed by using the “R” package (www.r-project.org) “fdrtool” (K. Strimmer, <http://strimmerlab.org/software/fdrtool/>). Therein, the proportion of null values and the parameters of the null distribution are adaptively estimated from the data. For a detailed description of the method and package, see refs. 6 and 7.

1. Yoo SH, et al. (2004) PERIOD2::LUCIFERASE real-time reporting of circadian dynamics reveals persistent circadian oscillations in mouse peripheral tissues. *Proc Natl Acad Sci USA* 101:5339–5346.
2. Yamazaki S, et al. (2000) Resetting central and peripheral circadian oscillators in transgenic rats. *Science* 288:682–685.
3. Livak KJ, Schmittgen TD (2001) Analysis of relative gene expression data using real-time quantitative PCR and the 2(-Delta Delta C(T)) Method. *Methods* 25:402–408.
4. Abe M, et al. (2002) Circadian rhythms in isolated brain regions. *J Neurosci* 22:350–356.
5. Oster H, Damerow S, Hut RA, Eichele G (2006) Transcriptional profiling in the adrenal gland reveals circadian regulation of hormone biosynthesis genes and nucleosome assembly genes. *J Biol Rhythms* 21:350–361.
6. Strimmer K (2008) A unified approach to false discovery rate estimation. *BMC Bioinformatics* 9:303.
7. Strimmer K (2008) fdrtool: A versatile R package for estimating local and tail area-based false discovery rates. *Bioinformatics* 24:1461–1462.
8. Panda S, et al. (2002) Coordinated transcription of key pathways in the mouse by the circadian clock. *Cell* 109:307–320.
9. Storch KF, et al. (2002) Extensive and divergent circadian gene expression in liver and heart. *Nature* 417:78–83.
10. Nagoshi E, et al. (2004) Circadian gene expression in individual fibroblasts: Cell-autonomous and self-sustained oscillators pass time to daughter cells. *Cell* 119:693–705.

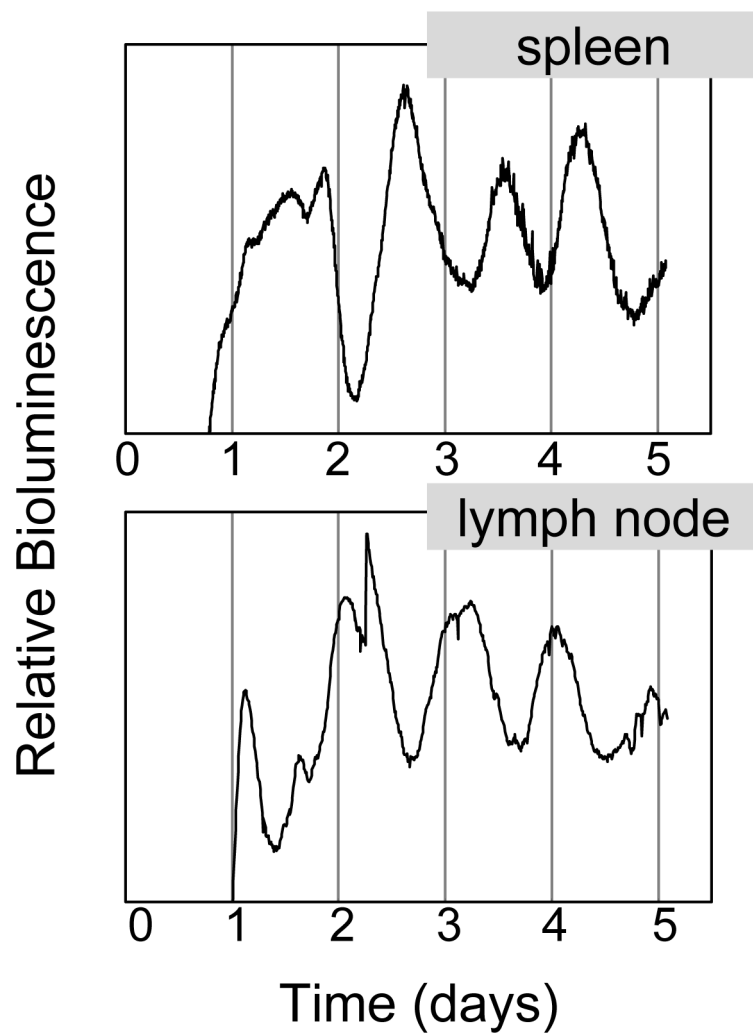

**Fig. S1.** Circadian, tissue autonomous oscillations in spleen and lymph nodes from a *Per1:luc* rat. A piece of spleen and two superficial inguinal lymph nodes were cultured individually and light emission was counted in 1-min bins for >5 days. Raw data were divided by a 24-h running average to eliminate trends in luminescence decay. Note, that damping of circadian rhythms in these tissue explants is believed to be caused by internal desynchronisation of self-sustained clock cells (10).



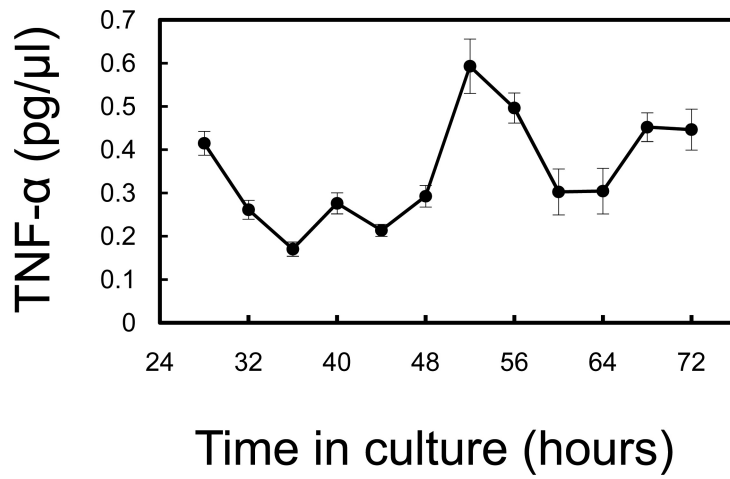

**Fig. S3.** Circadian cytokine secretion upon challenge with bacterial endotoxin in peritoneal macrophages. TNF- $\alpha$  secretion upon LPS stimulation is regulated by a local, cell intrinsic clockwork. Peritoneal macrophages from C57BL/6 mice were harvested, pooled, and plated for cell culture on multiple microtiter plates. Eight to ten wells per time point were stimulated with LPS, and supernatants were collected 4 h later. TNF- $\alpha$  concentrations in supernatants were analyzed by ELISA (mean values  $\pm$  SEM,  $n = 8-10$ ). Statistical analysis using CircWave revealed a significant circadian pattern ( $P < 0.01$ ).



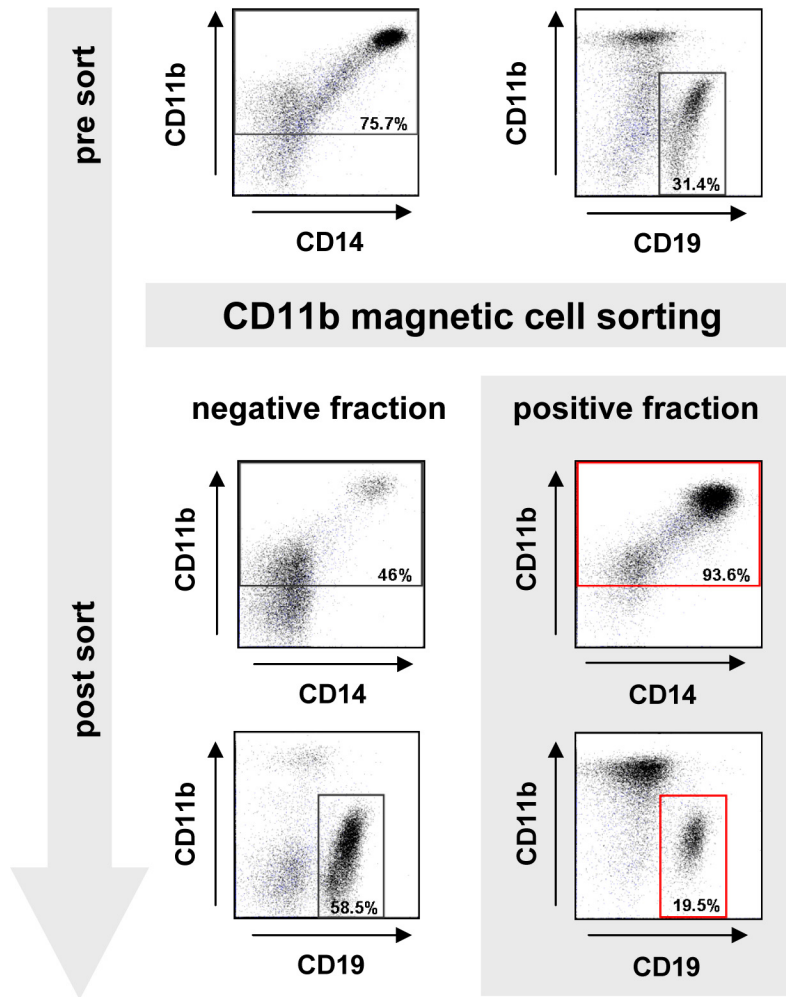

**Fig. S5.** Schematic representation of MACS sort strategy on peritoneal cells derived from C57BL/6 mice. Peritoneal macrophages designated to microarray transcriptional profiling were CD11b-MACS sorted and subsequently analyzed for sorting efficiency and purity.









**Table S1. Peak phases and amplitudes of circadian genes in peritoneal macrophages compared with other tissues**

| Gene symbol               | Peritoneal macrophages |                        |                | SCN*           | Liver**†       | Heart†         |
|---------------------------|------------------------|------------------------|----------------|----------------|----------------|----------------|
|                           | <i>P</i> <sup>‡</sup>  | Amplitude <sup>¶</sup> | Peak-phase [h] | Peak-phase [h] | Peak-phase [h] | Peak-phase [h] |
| <i>Nr1d1</i> <sup>§</sup> | ≤0.01                  | 5.38                   | 9.5            | 16.3           | 7.9/–          |                |
| <i>Dbp</i> <sup>§</sup>   | ≤0.01                  | 4.29                   | 11.7           |                | –/7.5          | 8.1            |
| <i>Nr1d2</i>              | ≤0.0001                | 3.37                   | 11.0           | 14.3           | 10.6/–         |                |
| <i>Per2</i> <sup>§</sup>  | ≤0.0001                | 3.22                   | 16.3           | 11.2           | 15.4/14.6      | 10.9           |
| <i>Per3</i>               | ≤0.0001                | 3.08                   | 13.4           |                |                |                |
| <i>Per1</i> <sup>§</sup>  | ≤0.05                  | 2.89                   | 11.7           |                | –/11.2         | 8.2            |
| <i>Arntl</i> <sup>§</sup> | ≤0.0001                | 2.82                   | 1.2            | 2.4            | –/20.8         | 22.8           |
| <i>Cry1</i> <sup>§</sup>  | ≤0.0001                | 2.62                   | 18.3           |                | –/17.3         |                |
| <i>Nfil3</i>              | ≤0.0001                | 2.34                   | 0.1            |                | 0.9/20.0       | 20.8           |
| <i>Cry2</i> <sup>§</sup>  | ≤0.01                  | 1.95                   | 14.8           |                |                |                |
| <i>Clock</i> <sup>§</sup> | ≤0.05                  | 1.24                   | 9.2            |                |                |                |

\*Data from ref. 8.

†Data from ref. 9.

‡*P* values have been determined by using CircWave Batch (5).

§Circadian gene transcription was confirmed by quantitative RT-PCR analysis (Fig. 4).

¶Amplitudes have been determined by calculating the peak-to-trough ratios from fitted sine waves (CircWave Batch).

**Table S2. Circadian control of gene transcription within the LPS response pathway**

| Gene symbol                | Synonym       | $P^{\dagger}$ | Lfdr <sup>‡</sup> | Amplitude | Phase [h] |
|----------------------------|---------------|---------------|-------------------|-----------|-----------|
| <i>Jun</i> <sup>§</sup>    | c-jun, AP-1   | ≤0.0001       | 0.01              | 1.61      | 13.7      |
| <i>Adam17</i> <sup>§</sup> | Tace, CD156b  | ≤0.0001       | 0.01              | 1.22      | 2.6       |
| <i>Cd180</i> <sup>§</sup>  | Rp105*, Ly78  | ≤0.0001       | 0.01              | 1.70      | 0.5       |
| <i>Sfpq</i>                | PSF           | ≤0.001        | 0.02              | 1.29      | 14.1      |
| <i>Nfkb1a</i> <sup>§</sup> | IκBα*         | ≤0.01         | 0.04              | 1.37      | 15.8      |
| <i>Ly86</i> <sup>§</sup>   | MD-1*         | ≤0.01         | 0.04              | 1.34      | 0.8       |
| <i>Map2k1</i> <sup>§</sup> | Mek1*, Prkmk1 | ≤0.01         | 0.05              | 1.17      | 11.3      |
| <i>Traf3</i>               | CAP-1, CD40bp | ≤0.01         | 0.05              | 1.27      | 11.6      |
| <i>Elavl1</i> <sup>§</sup> | HuR           | ≤0.01         | 0.05              | 1.32      | 10.2      |
| <i>Fos</i> <sup>§</sup>    | c-fos         | ≤0.01         | 0.05              | 1.75      | 12.9      |
| <i>Mapk3</i> <sup>§</sup>  | Erk1*, Prkm3  | ≤0.01         | 0.06              | 1.28      | 0.8       |
| <i>Map2k7</i> <sup>§</sup> | MKK7          | ≤0.01         | 0.06              | 1.42      | 1.4       |
| <i>Tank</i>                | I-TRAF        | ≤0.01         | 0.06              | 1.36      | 5.3       |
| <i>Rela</i>                | p65 NFκB, p65 | ≤0.05         | 0.09              | 1.19      | 20.2      |
| <i>Ikbkb</i>               | IKK2, IKKβ    | ≤0.05         | 0.09              | 1.18      | 11.8      |
| <i>Ripk1</i>               | Rip1*         | ≤0.05         | 0.09              | 1.11      | 22.7      |
| <i>Mapk14</i>              | p38*, Crk1    | ≤0.05         | 0.11              | 1.21      | 15.8      |
| <i>Cd14</i>                |               | ≤0.05         | 0.11              | 1.24      | 21.9      |
| <i>Map2k3</i>              | Mek3*, MKK3   | ≤0.05         | 0.15              | 1.39      | 14.7      |
| <i>Ccl3</i>                | MIP1-α*       | ≤0.05         | 0.15              | 1.65      | 1.3       |
| <i>Atf2</i>                | Creb2, CRE-BP | ≤0.05         | 0.15              | 1.20      | 22.8      |
| <i>Mknk2</i>               | Mnk2*, Gprk7  | ≤0.05         | 0.16              | 1.38      | 17.4      |
| <i>Mapkapk2</i>            | MK2*, Rps6kc1 | ≤0.05         | 0.17              | 1.17      | 15.7      |
| <i>Irf3</i>                |               | ≤0.05         | 0.17              | 1.12      | 4.5       |
| <i>Mef2c</i>               | Mef2          | ≤0.05         | 0.17              | 1.28      | 1.6       |
| <i>Tial1</i>               | mTIAR         | ≤0.05         | 0.17              | 1.17      | 15.2      |

Selected datasets from whole-genome transcriptional profiling using microarray analysis (see *Methods*).

\*Synonyms used in Fig. 5A.

<sup>†</sup> $P$  values have been determined by using CircWave Batch (5).

<sup>‡</sup>For a detailed description of local false discovery rate (lfdr) estimation see refs. 6 and 7.

<sup>§</sup>Circadian gene transcription was confirmed by quantitative RT-PCR analysis (Fig. 5).
